# Supplementary material
Source: PubMed Central journal article supplement (PMC6218932)
Supplement: NIHMS1503286-supplement-supplement.pdf [file NIHMS1503286-supplement-supplement.pdf]

**Supplement Table 1: Relationship to 3D Mitral Valve Parameters to MR in MFS Only**

|                                                           | <b>MR ≥ Moderate</b> |             | <b>MR ≤ Mild</b> |             | <b>p</b> |
|-----------------------------------------------------------|----------------------|-------------|------------------|-------------|----------|
|                                                           | <b>n=5</b>           |             | <b>n=22</b>      |             |          |
| <b>Annular Parameter</b>                                  |                      |             |                  |             |          |
| AP-Diameter (cm/M)                                        | 3.5                  | (3.5-3.8)   | 2.7              | (2.4-3.1)   | 0.02     |
| AL-PM diameter (cm/M)                                     | 4.3                  | (4.1-4.5)   | 3.1              | (2.7-3.5)   | 0.02     |
| Annular width at commissure (cm/M)                        | 4.1                  | (4.0-4.2)   | 3.1              | (2.7-3.4)   | 0.02     |
| Sphericity                                                | 0.86                 | (0.85-0.90) | 0.90             | (0.80-0.94) | 0.44     |
| Annulus circumference (cm/M <sup>2</sup> )                | 12.7                 | (12.4-13.2) | 10.1             | (8.6-10.7)  | 0.03     |
| Annulus area (cm <sup>2</sup> /M <sup>2</sup> )           | 11.9                 | (11.0-13.3) | 7.4              | (5.6-8.6)   | 0.03     |
| Annulus height (cm/M)                                     | 0.62                 | (0.46-0.68) | 0.58             | (0.43-0.75) | 0.87     |
| AHCWR                                                     | 0.14                 | (0.14-0.15) | 0.21             | (0.14-0.23) | 0.07*    |
| Non-Planar Angle (°)                                      | 150                  | (149-167)   | 145              | (138-155)   | 0.12*    |
| <b>Leaflet Parameter</b>                                  |                      |             |                  |             |          |
| Total Leaflet Area (cm <sup>2</sup> / M <sup>2</sup> )    | 13.1                 | (12.0-15.9) | 7.8              | (5.9-9.1)   | 0.03     |
| Anterior Leaflet Area (cm <sup>2</sup> /M <sup>2</sup> )  | 6.9                  | (5.8-7.7)   | 4.5              | (3.8-4.9)   | 0.02     |
| Posterior Leaflet Area (cm <sup>2</sup> /M <sup>2</sup> ) | 7.3                  | (5.2-8.1)   | 3.2              | (2.4-4.1)   | 0.03     |
| Anterior Leaflet Length (cm/M)                            | 2.2                  | (2.2-2.4)   | 2.0              | (1.7-2.2)   | 0.05*    |
| Posterior Leaflet Length (cm/M)                           | 1.6                  | (1.3-1.8)   | 1.0              | (0.8-1.2)   | 0.05*    |
| Tenting Height (mm/M)                                     | 1.6                  | (1.6-3.2)   | 3.8              | (2.5-5.1)   | 0.09*    |
| Tenting Area (cm <sup>2</sup> /M <sup>2</sup> )           | 0.59                 | (0.12-0.74) | 0.57             | (0.35-0.82) | 0.87     |
| Billow Volume (cc/M <sup>2</sup> )                        | 1.1                  | (0.6-3.3)   | 0.07             | (0.01-0.16) | <0.01    |
| Tenting Volume (cc/M <sup>2</sup> )                       | 0.3                  | (0.1-0.9)   | 0.7              | (0.3-1.0)   | 0.04     |

Values are listed as median (IQR), P-values calculated by Wilcoxon rank sum test.

A-P: Anterior-Posterior, AL-PM: Anterolateral-Posteromedial

AHCWR: Annular height to commissural width ratio, BSA: Body Surface Area

\*Significant in larger cohort n=54, but not in MFS only group (n=27)
